# Supplementary material
Source: publisher site journal article supplement (https://www.dovepress.com/article/182296)
Supplement: Supplementary file 1 [file get_supplementary_file.php]

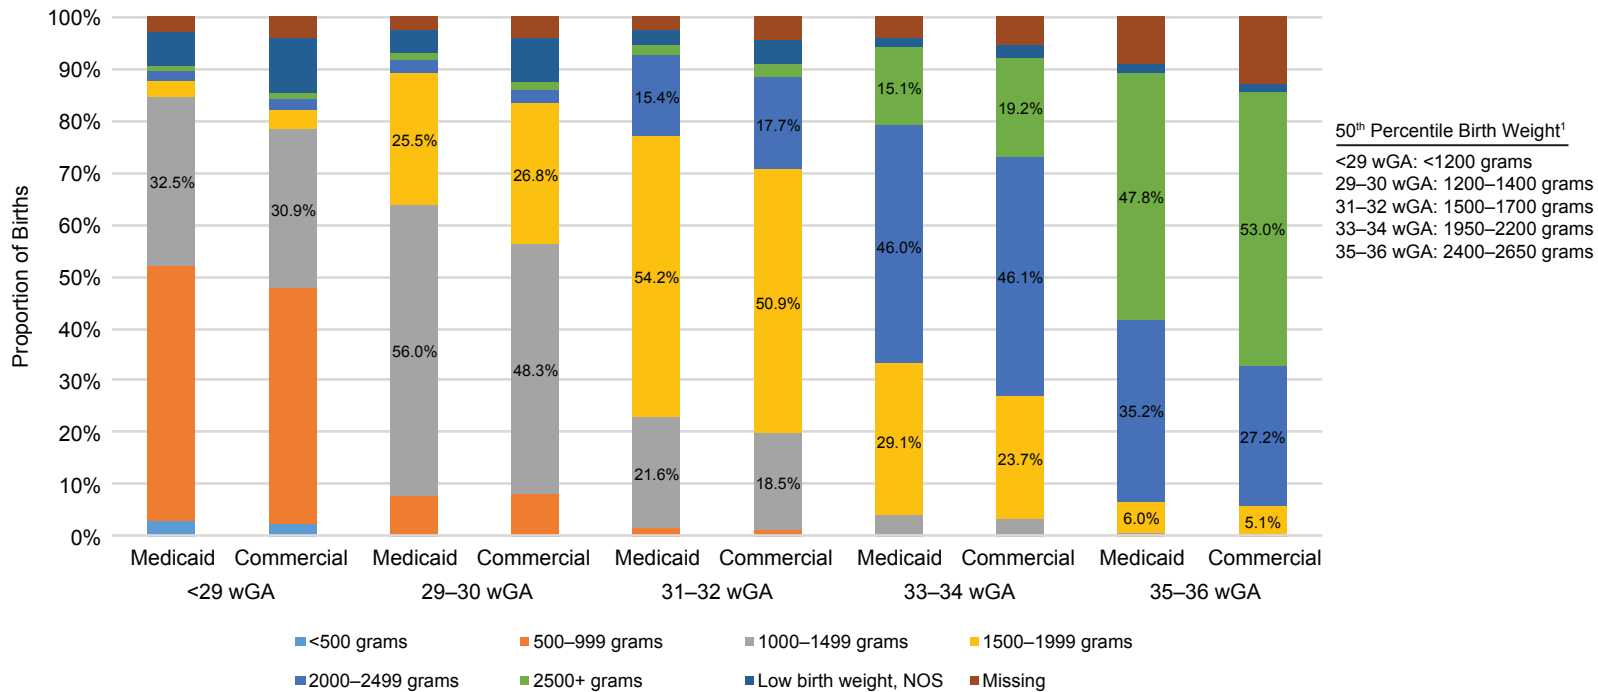

**Figure S1. Birth weight among preterm births**

Notes: 50<sup>th</sup> percentile of birth weight was approximated.<sup>1</sup>

Abbreviations: NOS, not otherwise specified; wGA, weeks gestational age.

1. Olsen IE, Groveman SA, Lawson ML, Clark RH, Zemel BS. New intrauterine growth curves based on United States data. *Pediatrics*. 2010;125(2):e214–e224.

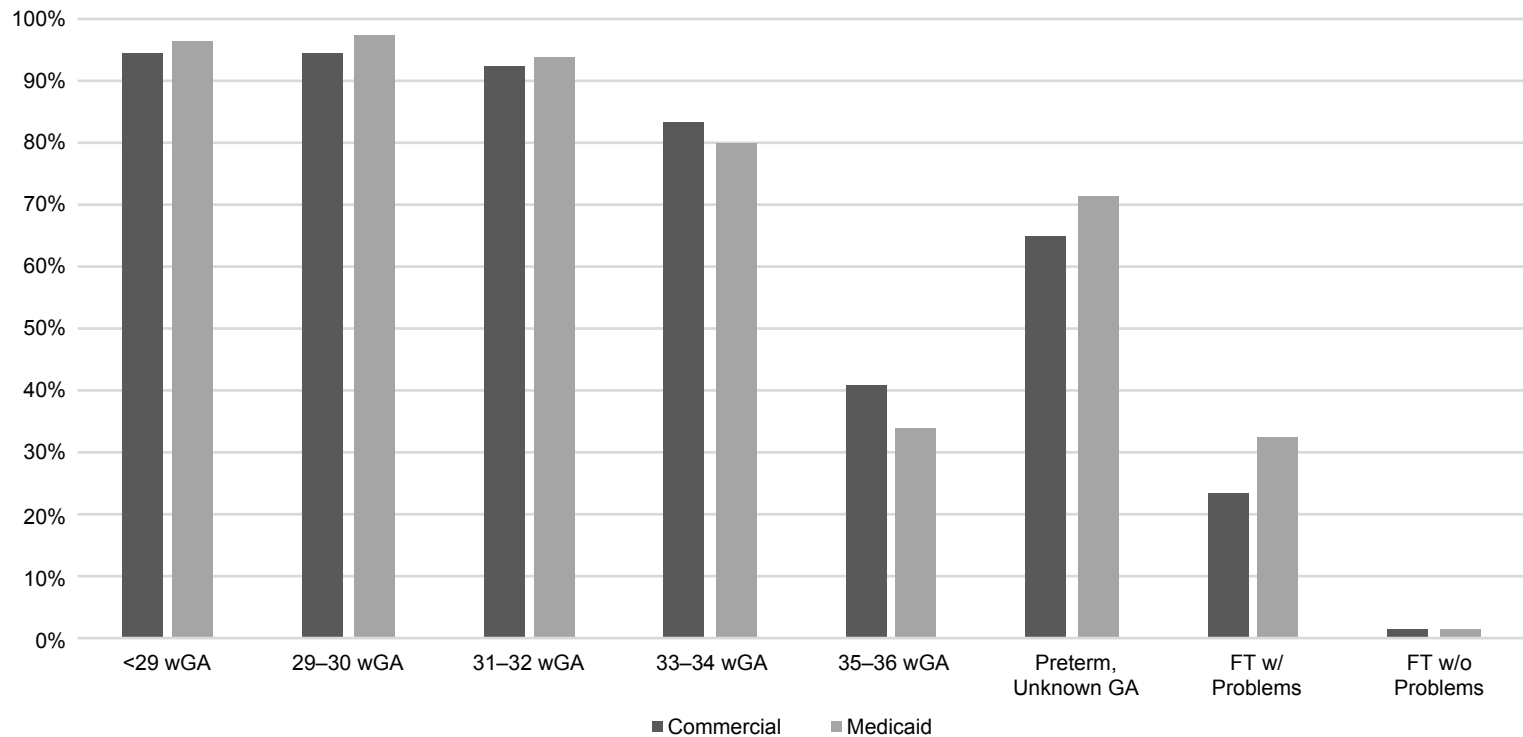

**Figure S2. Proportion admitted to the NICU during birth hospitalization**

Abbreviations: FT, full-term; GA, gestational age; NICU, neonatal intensive care unit; wGA, weeks gestational age.
